# Supplementary material
Source: PubMed Central journal article supplement (PMC5351725)
Supplement: kpsb-12-02-1282023-s001.pdf [file kpsb-12-02-1282023-s001.pdf]

At4g25910 254038\_at *ATCNF3*

Arabidopsis eFP Browser at bar.utoronto.ca  
Winter et al., 2007. PLoS One 2(8): e718

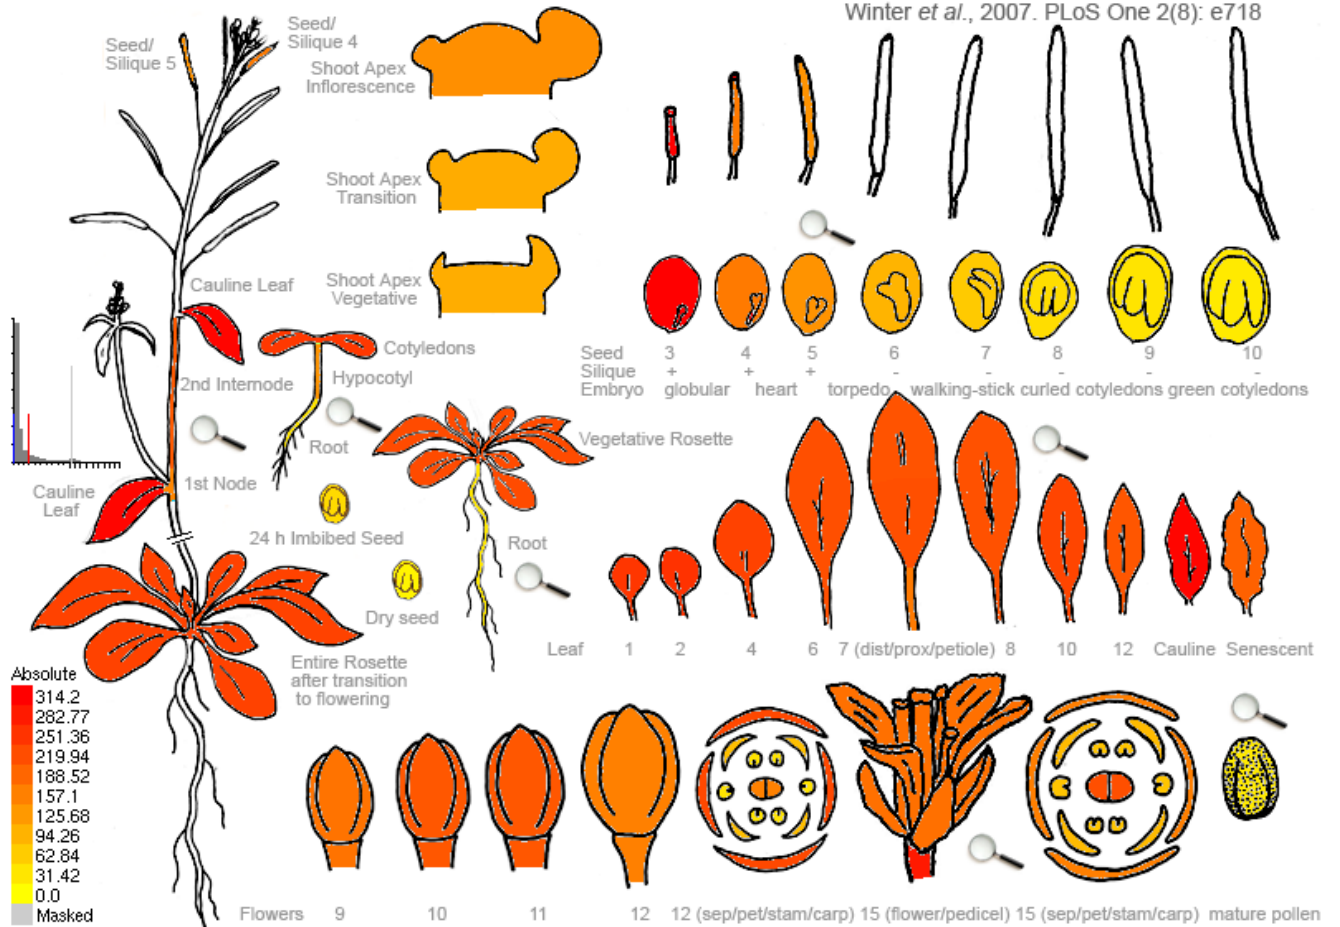

eFP Browser by B. Vinegar, drawn by J. Alls and N. Provar. Data from Gene Expression Map of Arabidopsis Development: Schmid et al., 2005, Nat. Gen. 37:501, and the Nambara lab for the imbibed and dry seed stages. Data are normalized by the GCOS method, TGT value of 100. Most tissues were sampled in triplicate.

**Supplemental Figure S1.** Relative expression levels of *NFU3* in different parts of the wild-type Arabidopsis plant, as reported by the Arabidopsis eFP browser.
